# Supplementary material for: Predictors of SARS-CoV-2 Infection and Severe and Lethal COVID-19 after Three Years of Follow-Up: A Population-Wide Study
Source: MDPI journal article supplement (doi:10.3390/v15091794), 2023-08-24
Supplement: s1 [file s1]

**Table S1.** Adjusted hazards ratios (HR; 95% confidence interval - CI)<sup>A</sup> of each recorded outcome, during the Omicron predominance (from 1 January, 2022 to the end of follow-up)<sup>Ω</sup>.

| <b>Outcomes</b>                           | <b>SARS-CoV-2<br/>infection</b><br>HR (95% CI) | <b>Severe<br/>COVID-19<sup>B</sup></b><br>HR (95% CI) | <b>COVID-19-Related<br/>Death<sup>B</sup></b><br>HR (95% CI) |
|-------------------------------------------|------------------------------------------------|-------------------------------------------------------|--------------------------------------------------------------|
| Male gender                               | 0.82 (0.81-0.83)*                              | 0.91 (1.83-1.00)                                      | 0.83 (0.73-0.95)*                                            |
| <i>Age class in years</i>                 |                                                |                                                       |                                                              |
| 60 or more                                | 1 (Ref. cat.)                                  | 1 (Ref. cat.)                                         | 1 (Ref. cat.)                                                |
| 30–59                                     | 1.31 (1.29-1.34)*                              | 0.04 (0.03-0.07)*                                     | 0.01 (0.00-0.02)*                                            |
| 10–29                                     | 1.40 (1.38-1.43)*                              | 0.28 (0.24-0.32)*                                     | 0.06 (0.05-0.08)*                                            |
| <i>Risk factors and<br/>comorbidities</i> |                                                |                                                       |                                                              |
| Hypertension                              | 1.00 (0.97-1.02)                               | 2.32 (2.05-2.63)*                                     | 1.69 (1.45-1.98)*                                            |
| Diabetes                                  | 1.01 (0.97-1.04)                               | 1.34 (1.19-1.51)*                                     | 1.23 (1.06-1.44)*                                            |
| CVD                                       | 1.26 (1.22-1.29)*                              | 1.42 (1.32-1.53)*                                     | 2.12 (1.82-2.46)*                                            |
| COPD                                      | 1.26 (1.22-1.30)*                              | 1.91 (1.70-2.15)*                                     | 1.98 (1.69-2.33)*                                            |
| Kidney disease                            | 1.11 (1.06-1.17)*                              | 2.52 (2.23-2.84)*                                     | 3.24 (2.74-3.82)*                                            |
| Cancer                                    | 1.12 (1.09-1.15)*                              | 2.11 (1.88-2.37)*                                     | 2.78 (2.42-3.20)*                                            |
| <i>Vaccination status</i>                 |                                                |                                                       |                                                              |
| - Unvaccinated                            | 1 (Ref. cat.)                                  | 1 (Ref. cat.)                                         | 1 (Ref. cat.)                                                |
| - 1 dose <sup>C</sup>                     | 1.28 (1.22-1.35)*                              | 0.76 (0.54-1.06)                                      | 1.09 (0.71-1.69)                                             |
| - 2 doses <sup>D</sup>                    | 3.43 (3.35-3.51)*                              | 0.59 (0.50-0.68)*                                     | 0.75 (0.60-0.93)*                                            |
| - 3 or more doses <sup>E</sup>            | 1.47 (1.44-1.50)*                              | 0.26 (0.23-0.30)*                                     | 0.30 (0.25-0.37)*                                            |

<sup>Ω</sup> The 27,912 subjects who died or had a SARS-CoV-2 infection before January 1, 2022 were excluded from the sample.

COVID-19 = virologically confirmed COVID-19 disease, diagnosed by a specialist physician and requiring hospital admission.

\* p<0.001.

<sup>A</sup> Based on Cox proportional hazards models.

<sup>B</sup> Analyses restricted to the subjects who had at least one positive SARS-CoV-2 swab during the follow-up.

<sup>C</sup> Subjects who received only one dose of BNT162b2, mRNA-1273, ChAdOx1 nCoV-19 or NVX-CoV2373 vaccines between January 2, 2021 and December 31, 2022.

<sup>D</sup> Subjects who received only two doses of BNT162b2, mRNA-1273, ChAdOx1 nCoV-19, or NVX-CoV2373 vaccines, or one dose of JNJ-78436735 vaccine, between January 2, 2021 and December 31, 2022.

<sup>E</sup> Subjects who received three or four doses of BNT162b2, mRNA-1273, ChAdOx1 nCoV-19, JNJ-78436735 or NVX-CoV2373 vaccines between January 2, 2021 and December 31, 2022.
